# Supplementary material for: Measuring health system responsiveness at facility level in Ethiopia: performance, correlates and implications
Source: Springer Nature journal article supplement (doi:10.1186/s12913-017-2224-1), 2017-04-11
Supplement: MOESM1 [file 12217458]

*Additional file 1 Categorization of Participant Responses to Responsiveness Performances*

| <i>Responsiveness Doman (no. of questions)</i> | <i>Responses Categorized Fail</i>                                                                               | <i>Minimum % score (No. of questions *100/D)</i> | <i>Cut-off scores for fail (B)</i> | <i>% cut-off Fail (B*100%/D)</i> | <i>Responses Categorized Good</i>    | <i>Cut-off scores for Good (C)</i> | <i>% cut-off for Good (C*100%/D)</i> | <i>Responses Categorized Very Good</i> | <i>Maximum Score (D)</i> | <i>Maximum % score (D*100%/D)</i> |
|------------------------------------------------|-----------------------------------------------------------------------------------------------------------------|--------------------------------------------------|------------------------------------|----------------------------------|--------------------------------------|------------------------------------|--------------------------------------|----------------------------------------|--------------------------|-----------------------------------|
| <i>Autonomy (6)</i>                            | Extremely disagree, strongly disagree, disagree, neutral                                                        | 14.4                                             | 24                                 | 57.1                             | Agree, strongly agree                | 36                                 | 75.0                                 | Extremely agree                        | 42                       | 100.0                             |
| <i>Attention (7)</i>                           | Very long, long                                                                                                 | 20.0                                             | 21                                 | 60.0                             | Usually                              | 28                                 | 80.0                                 | Always                                 | 35                       | 100.0                             |
| <i>Communication (7)</i>                       | Very bad, bad, neutral                                                                                          | 20.0                                             | 21                                 | 60.0                             | Good                                 | 28                                 | 80.0                                 | Very Good                              | 35                       | 100.0                             |
| <i>Amenities (11)</i>                          | Very bad, bad, neutral                                                                                          | 20.0                                             | 33                                 | 60.0                             | Good                                 | 44                                 | 80.0                                 | Very Good                              | 55                       | 100.0                             |
| <i>Choice (3)</i>                              | Never, only sometimes                                                                                           | 25.0                                             | 6                                  | 50.0                             | Usually                              | 9                                  | 75.0                                 | Always                                 | 12                       | 100.0                             |
| <i>Confidentiality (3)</i>                     | Never, only sometimes                                                                                           | 25.0                                             | 6                                  | 50.0                             | Usually                              | 9                                  | 75.0                                 | Always                                 | 12                       | 100.0                             |
| <i>Respect (7)</i>                             | Never, only sometimes                                                                                           | 25.0                                             | 14                                 | 50.0                             | Usually                              | 21                                 | 75.0                                 | Always                                 | 28                       | 100.0                             |
| <i>Total Responsiveness (44)</i>               | Extremely disagree, strongly disagree, disagree, neutral, very long, long, very bad, bad, never, only sometimes | 20.1                                             | 129                                | 58.9                             | Agree, strongly agree, usually, good | 175                                | 79.9                                 | extremely agree, always, very good     | 219                      | 100.0                             |

[illegible]
